# Supplementary material for: The genome-wide structure of the Jewish people
Source: Springer Nature journal article supplement (doi:10.1038/nature09103), 2010-06-08
Supplement: 41586_2010_BFnature09103_MOESM302_ESM.pdf [file 41586_2010_BFnature09103_MOESM302_ESM.pdf]

eigenvector 1; eigenvalue = 54.1

eigenvector 2; eigenvalue = 44.4

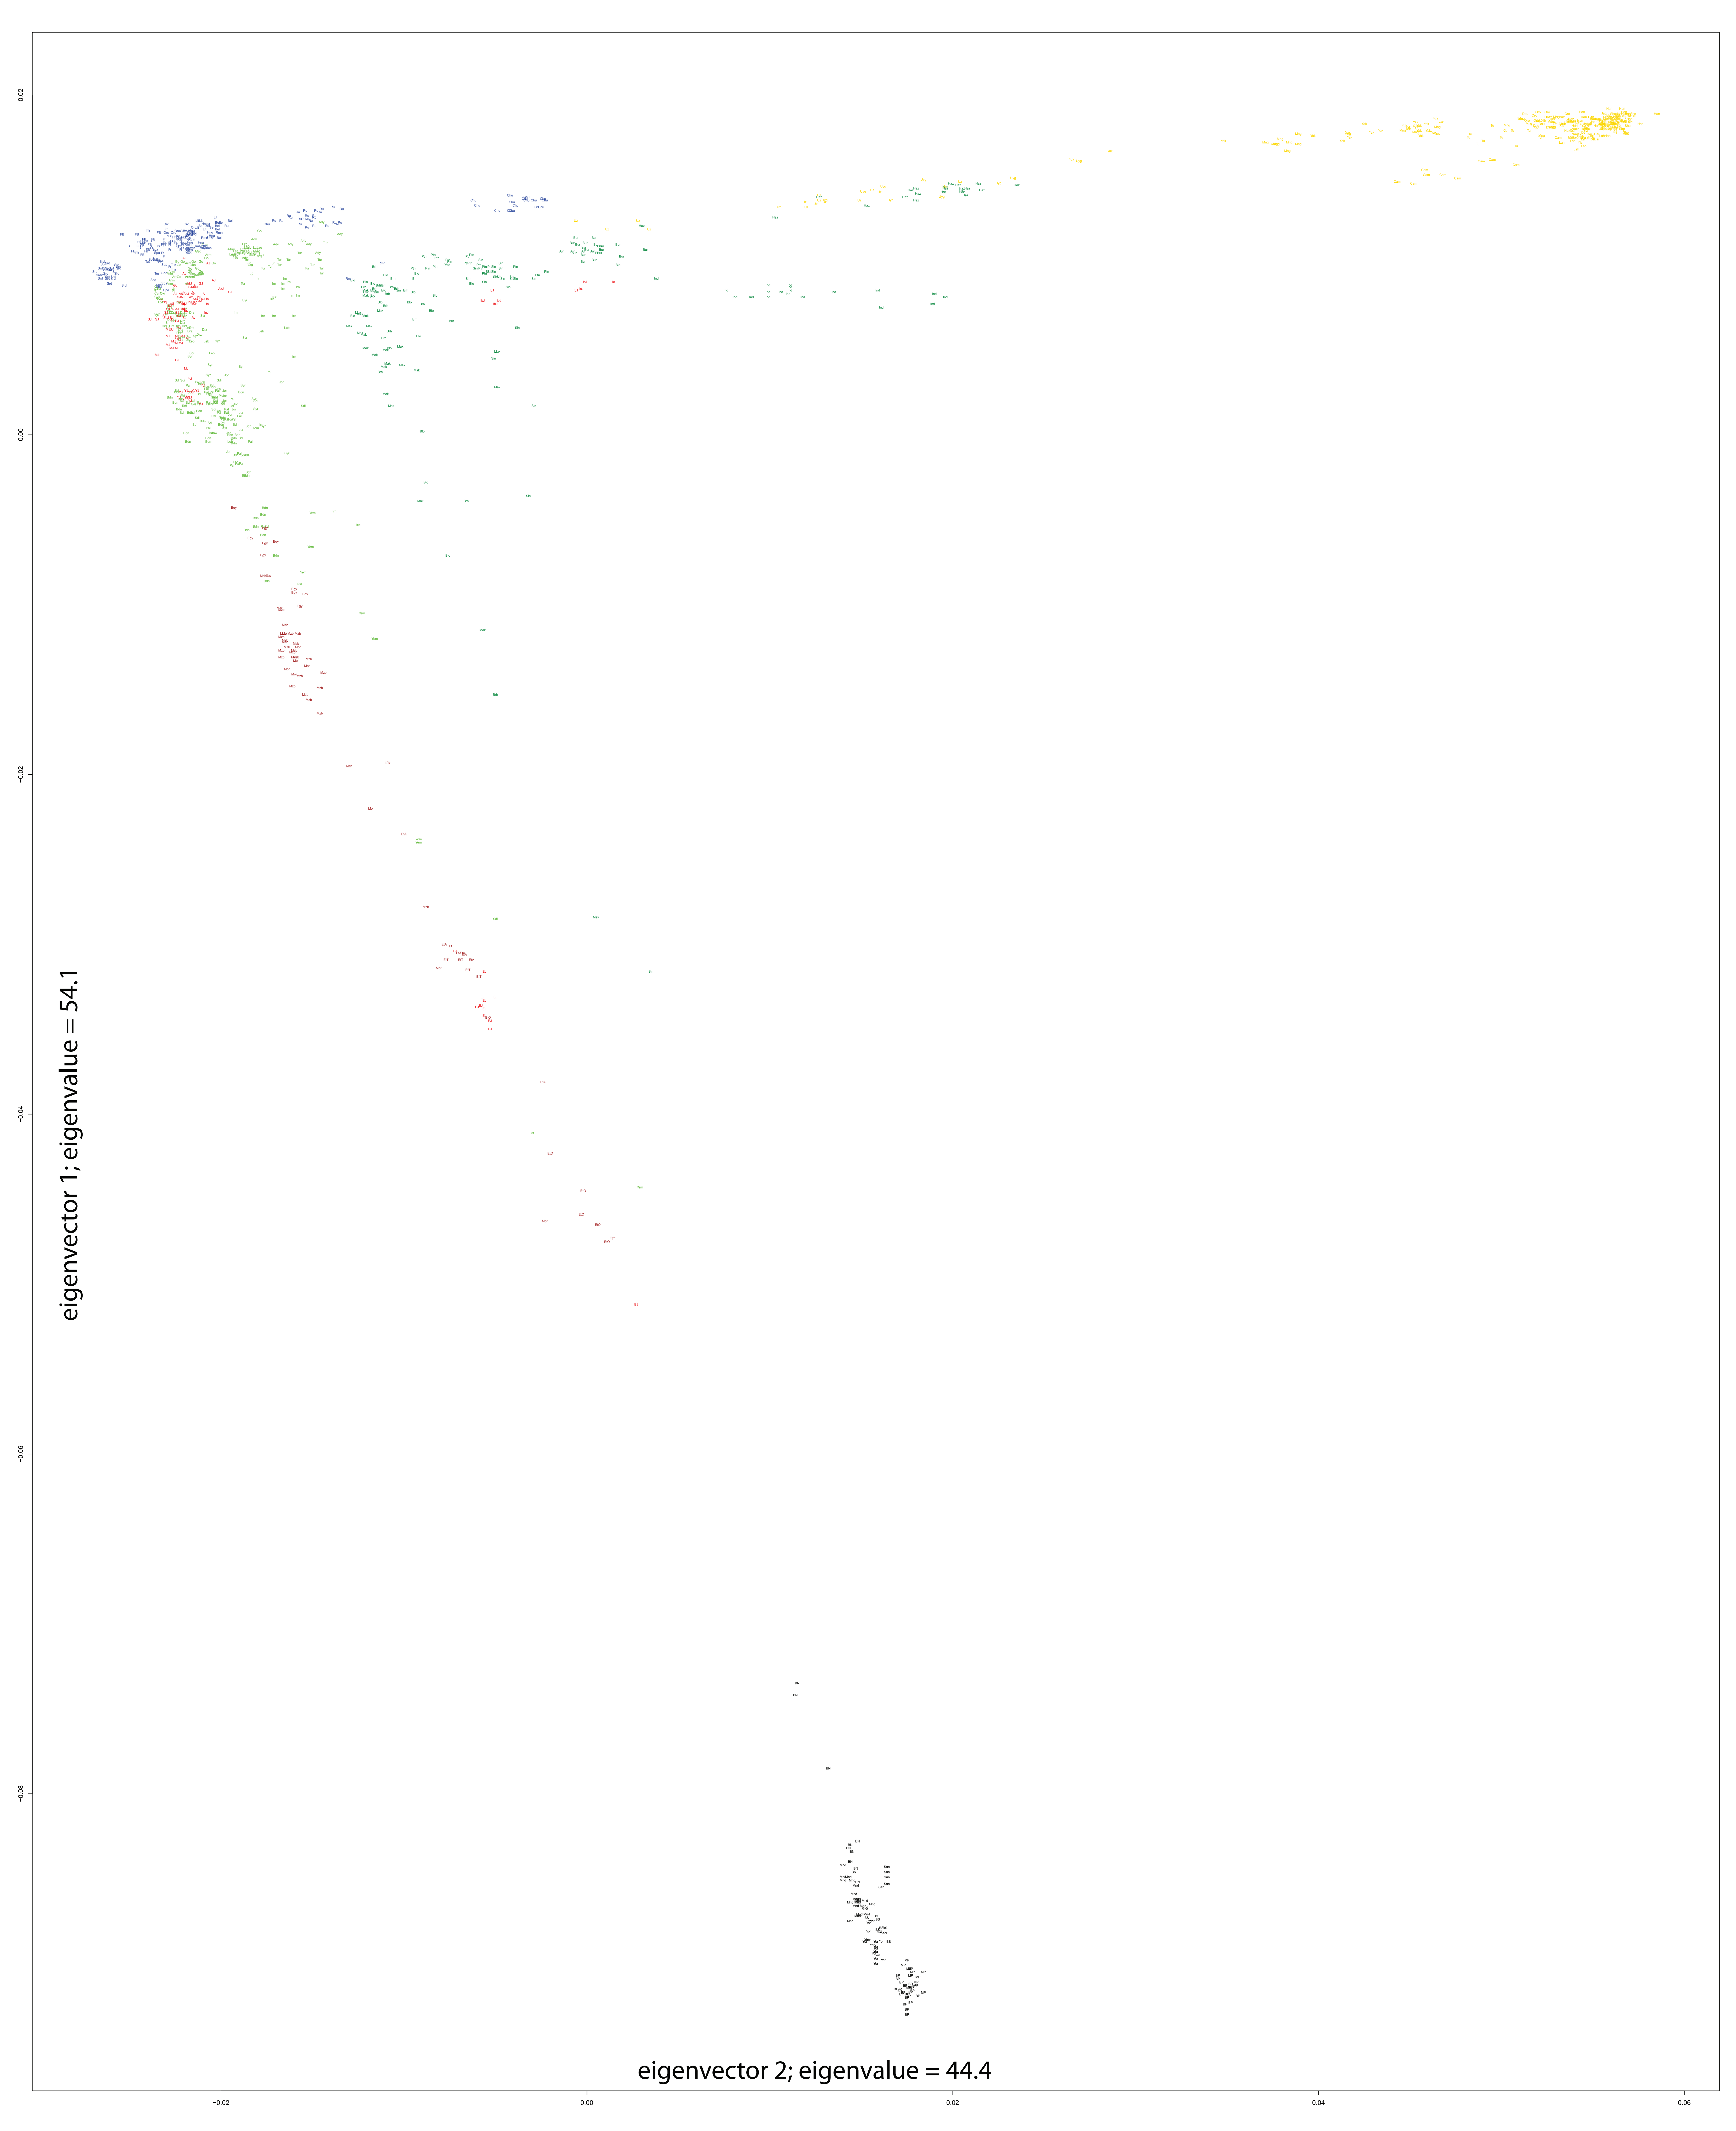

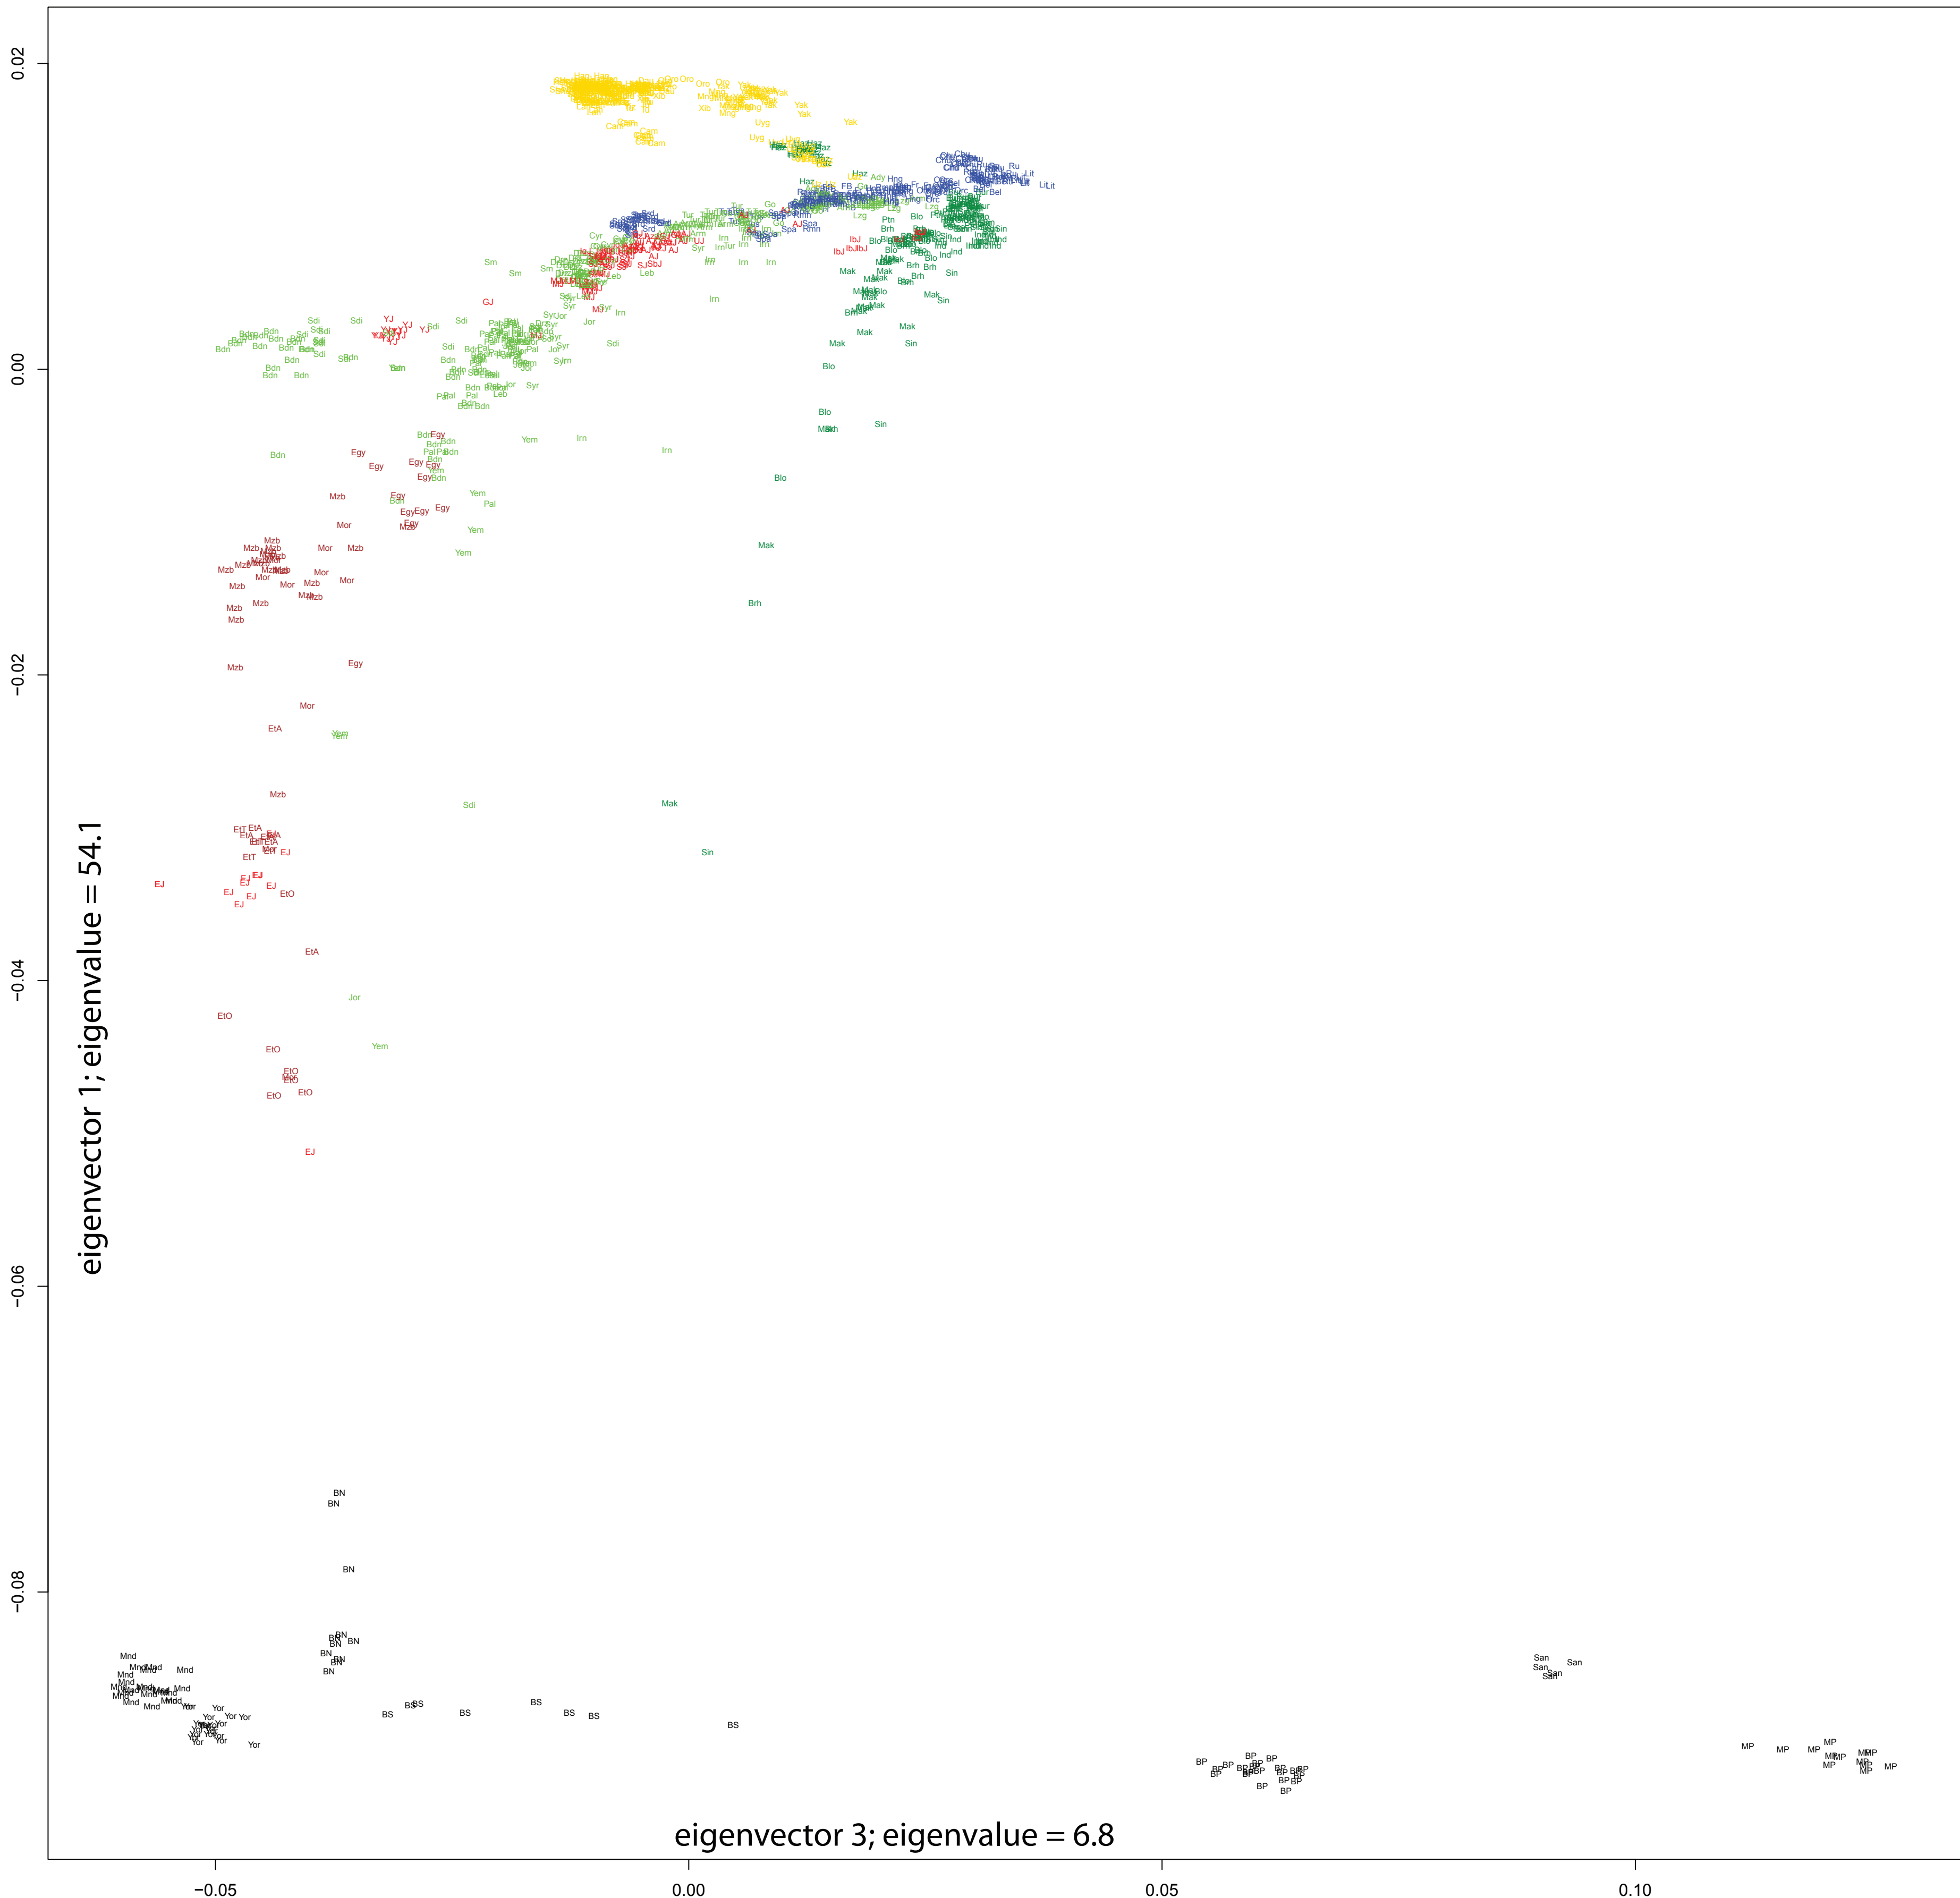

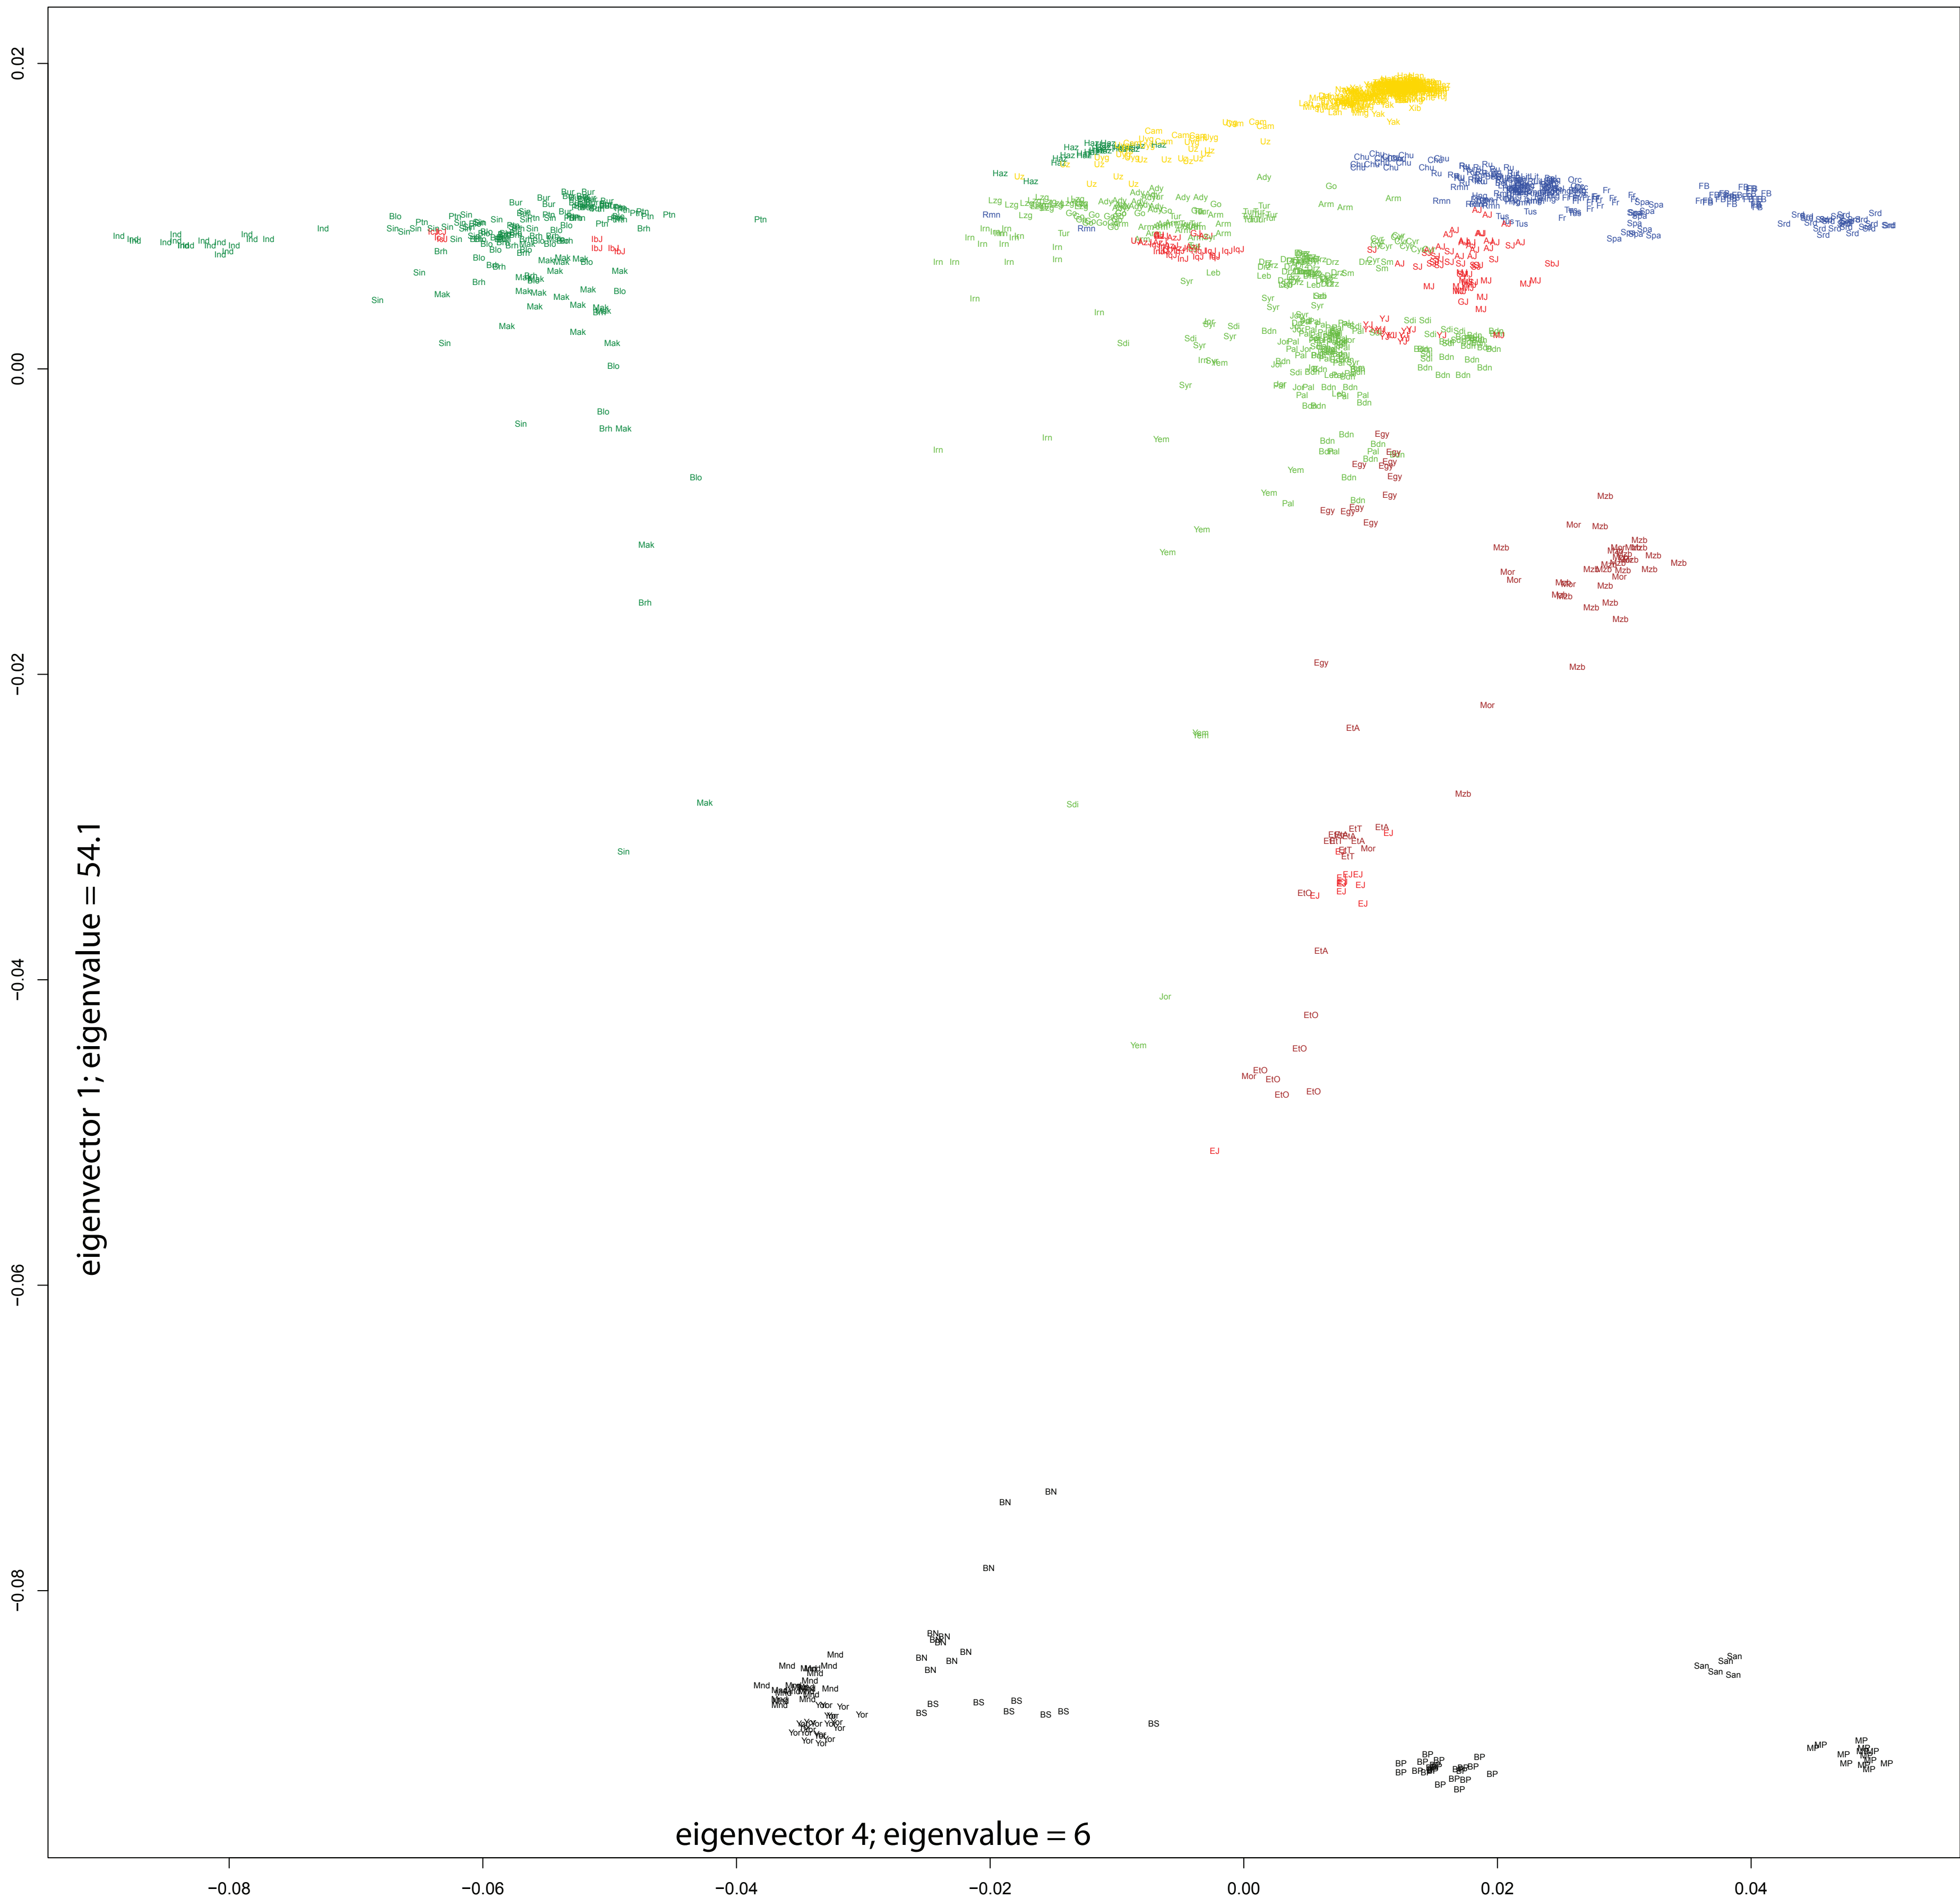

eigenvector 1; eigenvalue = 54.1

eigenvector 4; eigenvalue = 6
