# Supplementary material for: The genome-wide structure of the Jewish people
Source: Springer Nature journal article supplement (doi:10.1038/nature09103), 2010-06-08
Supplement: nature09103-s1.pdf [file nature09103-s1.pdf]

Browse Articles
| Nature


Skip to main content

Thank you for visiting nature.com. You are using a browser version with limited support for CSS. To obtain
the best experience, we recommend you use a more up to date browser (or turn off compatibility mode in
Internet Explorer). In the meantime, to ensure continued support, we are displaying the site without styles
and JavaScript.

Advertisement


- View all journals
- Search
- Log in

- Explore content
- About the journal
- Publish with us
- Subscribe

- Sign up for alerts
- RSS feed


1. nature
2. browse articles

# Browse Articles

## Filter By:

Article Type

All

- All
- Article (23103)
- Book Review (21161)
- Books & Arts (2987)
- Books Received (28076)
- Correspondence (11964)
- Editorial (4202)
- Erratum (1641)
- Letter (120287)
- Matters Arising (1722)
- Miscellany (7852)
- News (104823)
- News & Views (40687)
- News Feature (2408)
- News in Brief (1760)
- Obituary (7007)
- Opinion (5080)
- Research Highlight (2420)
- Research Highlights (4493)
- Scientific Correspondence (4028)
- Supplement to Nature (1556)

Year

All

- All
- 2024 (1394)
- 2023 (4320)
- 2022 (4104)
- 2021 (3737)
- 2020 (3623)
- 2019 (3979)
- 2018 (3934)
- 2017 (3696)
- 2016 (3903)
- 2015 (4056)
- 2014 (4078)
- 2013 (4119)
- 2012 (4260)
- 2011 (4115)
- 2010 (4173)
- 2009 (4396)
- 2008 (4681)
- 2007 (4089)
- 2006 (4072)
- 2005 (4066)

- ### Bird flu virus has been spreading in US cows for months, RNA reveals

  Genomic analysis suggests that the outbreak probably began in December or January, but a shortage of data is hampering efforts to pin down the source.

  - Smriti Mallapaty

  News27 Apr 2024
- ### Audio long read: Why loneliness is bad for your health

  New research is revealing the mechanisms linking loneliness and conditions like dementia, depression and cardiovascular disease.

  - Saima May Sidik
  - Benjamin Thompson

  Nature Podcast26 Apr 2024
- ### Could a rare mutation that causes dwarfism also slow ageing?

  People with Laron syndrome have a low risk of heart disease and a number of other age-related disorders, hinting at strategies for new treatments.

  - Mariana Lenharo

  News26 Apr 2024
- ### Want to make a difference? Try working at an environmental non-profit organization

  Moving to non-profit work requires researchers to shift their mindset to focus on applied science for policymaking and conservation practice.

  - Natasha Gilbert

  Career Feature26 Apr 2024
- ### Future of Humanity Institute shuts: what’s next for ‘deep future’ research?

  Researchers from several disciplines hope to predict — and prevent — scenarios that pose risks to humanity.

  - David Adam

  News26 Apr 2024
- ### Garden-variety fungus is an expert at environmental clean-ups

  The common fungus *Aspergillus niger* removes both heavy metals and organic pollutants from its surroundings.

  Research Highlight25 Apr 2024
- ### Air-travel climate-change emissions detailed for nearly 200 nations

  Carbon emissions from flights that departed from low- and middle-income countries in 2019 totalled 417 million tonnes.

  Research Highlight25 Apr 2024
- ### Rat neurons repair mouse brains — and restore sense of smell

  Scientists develop hybrid mice by filling in missing cells and structures in their brains with rat stem cells.

  - Sara Reardon

  News25 Apr 2024
- ### Hello puffins, goodbye belugas: changing Arctic fjord hints at our climate future

  Stunning images show an ecosystem’s upheaval as it warms at an alarming pace.

  - Freda Kreier

  News25 Apr 2024
- ### Scientists urged to collect royalties from the ‘magic money tree’

  By joining a collecting society, researchers can ensure they are paid when copyrighted book content and papers are reproduced.

  - Oscar Allan

  Career Feature25 Apr 2024
- ### Daily briefing: How an unlikely friendship with Jung influenced Pauli’s physics

  A patient-analyst relationship to psychoanalyst Carl Jung that evolved into a friendship deeply influenced physicist Wolfgang Pauli’s work. Plus, organoids shed light on cancer and other diseases, and medieval graves reveal secrets of a mysterious nomadic people.

  - Flora Graham

  Nature Briefing25 Apr 2024
- ### China's Moon atlas is the most detailed ever made

  The *Geologic Atlas of the Lunar Globe* doubles the resolution of Apollo-era maps and will support the space ambitions of China and other countries.

  - Ling Xin

  News25 Apr 2024
- ### ‘Shut up and calculate’: how Einstein lost the battle to explain quantum reality

  By suppressing questions they considered too ‘philosophical’, post-war physicists created an unquestioning orthodoxy that influences science to this day.

  - Jim Baggott

  Essay25 Apr 2024
- ### Algorithm ranks peer reviewers by reputation — but critics warn of bias

  There are questions about whether the tool, which could be used by editors to find and shortlist peer reviewers, would disadvantage inexperienced candidates or those in certain locations.

  - Dalmeet Singh Chawla

  Nature Index25 Apr 2024
- ### NIH pay rise for postdocs and PhD students could have US ripple effect

  Salary increases for the 17,000-plus recipients of an NIH research award could lead to increases in other academic settings.

  - Amanda Heidt

  News25 Apr 2024
- ### Bird flu in US cows: is the milk supply safe?

  Pasteurized milk is probably not a threat to people, but fresh milk droplets on milking equipment could be spreading the virus in a herd.

  - Julian Nowogrodzki

  News Explainer25 Apr 2024
- ### Judge dismisses superconductivity physicist’s lawsuit against university

  Ranga Dias sued his university, in part, for allegedly conducting a biased investigation, which found he had committed extensive scientific misconduct.

  - Dan Garisto

  News25 Apr 2024
- ### NATO is boosting AI and climate research as scientific diplomacy remains on ice

  As the military alliance created to counter the Soviet Union expands, it is prioritizing studies on how climate change affects security, cyberattacks and election interference.

  - Natasha Gilbert

  News Explainer25 Apr 2024
- ### Are robots the solution to the crisis in older-person care?

  Social robots that promise companionship and stimulation for older people and those with dementia are attracting investment, but some question their benefits.

  - Tammy Worth

  Outlook25 Apr 2024
- ### Structures of human γδ T cell receptor–CD3 complex

  - Weizhi Xin
  - Bangdong Huang
  - Qiang Zhou

  Article24 Apr 2024

- Previous page
- page 1
- page 2
- page 3
- …
- page 21797
- Next page

## Explore content

- Research articles
- News
- Opinion
- Research Analysis
- Careers
- Books & Culture
- Podcasts
- Videos
- Current issue
- Browse issues
- Collections
- Subjects

- Follow us on Facebook
- Follow us on Twitter
- Subscribe
- Sign up for alerts
- RSS feed


## About the journal

- Journal Staff
- About the Editors
- Journal Information
- Our publishing models
- Editorial Values Statement
- Journal Metrics
- Awards
- Contact
- Editorial policies
- History of Nature
- Send a news tip


## Publish with us

- For Authors
- For Referees
- Language editing services
- Submit manuscript

## Search

Search articles by subject, keyword or author

Show results from

All journals
This journal

Search

Advanced search

### Quick links

- Explore articles by subject
- Find a job
- Guide to authors
- Editorial policies

Nature (*Nature*)

ISSN 1476-4687 (online)

ISSN 0028-0836 (print)

## nature.com sitemap

### About Nature Portfolio

- About us
- Press releases
- Press office
- Contact us

### Discover content

- Journals A-Z
- Articles by subject
- protocols.io
- Nature Index

### Publishing policies

- Nature portfolio policies
- Open access

### Author & Researcher services

- Reprints & permissions
- Research data
- Language editing
- Scientific editing
- Nature Masterclasses
- Research Solutions

### Libraries & institutions

- Librarian service & tools
- Librarian portal
- Open research
- Recommend to library

### Advertising & partnerships

- Advertising
- Partnerships & Services
- Media kits
- Branded
  content

### Professional development

- Nature Careers
- Nature 
  Conferences

### Regional websites

- Nature Africa
- Nature China
- Nature India
- Nature Italy
- Nature Japan
- Nature Middle East

- Privacy
  Policy
- Use
  of cookies
- Your privacy choices/Manage cookies
- Legal
  notice
- Accessibility
  statement
- Terms & Conditions
- Your US state privacy rights

© 2024 Springer Nature Limited

xml version="1.0" encoding="UTF-8"?
